# Supplementary material for: Properties of tin oxide films grown by atomic layer deposition from tin tetraiodide and ozone
Source: publisher site journal article supplement (doi:10.3762/bjnano.14.89), 2023-11-13
Supplement: Additional file 1 [file 2190-4286-14-89-S1.pdf]

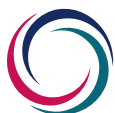

## Supporting Information

for

### **Properties of tin oxide films grown by atomic layer deposition from tin tetraiodide and ozone**

Kristjan Kalam, Peeter Ritslaid, Tanel Käämbre, Aile Tamm and Kaupo Kukli

*Beilstein J. Nanotechnol.* **2023**, *14*, 1085–1092. doi:10.3762/bjnano.14.89

## Supplementary material

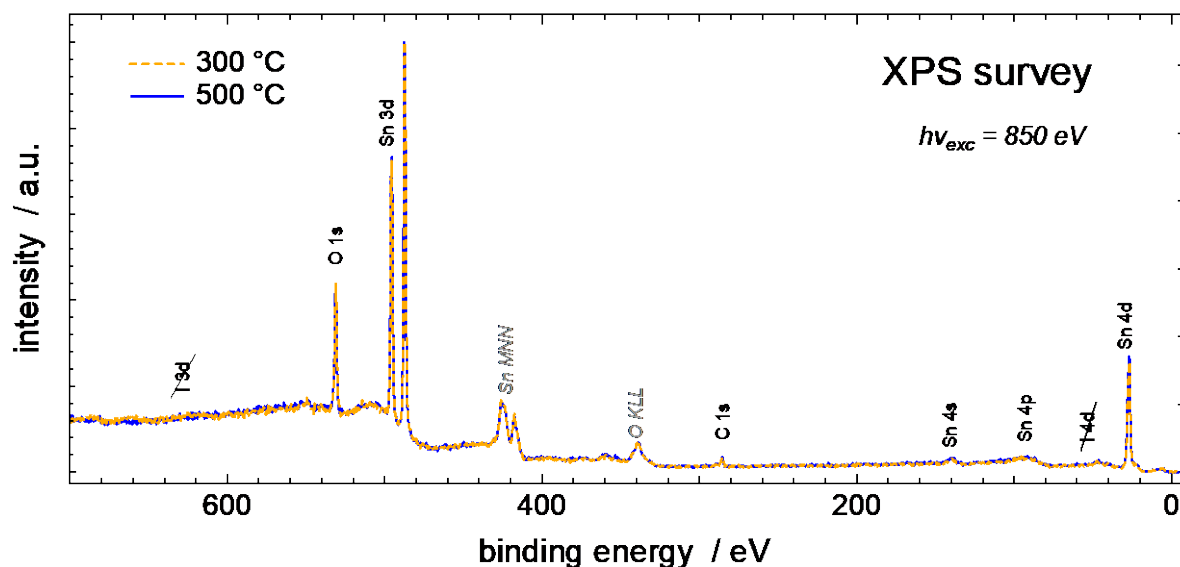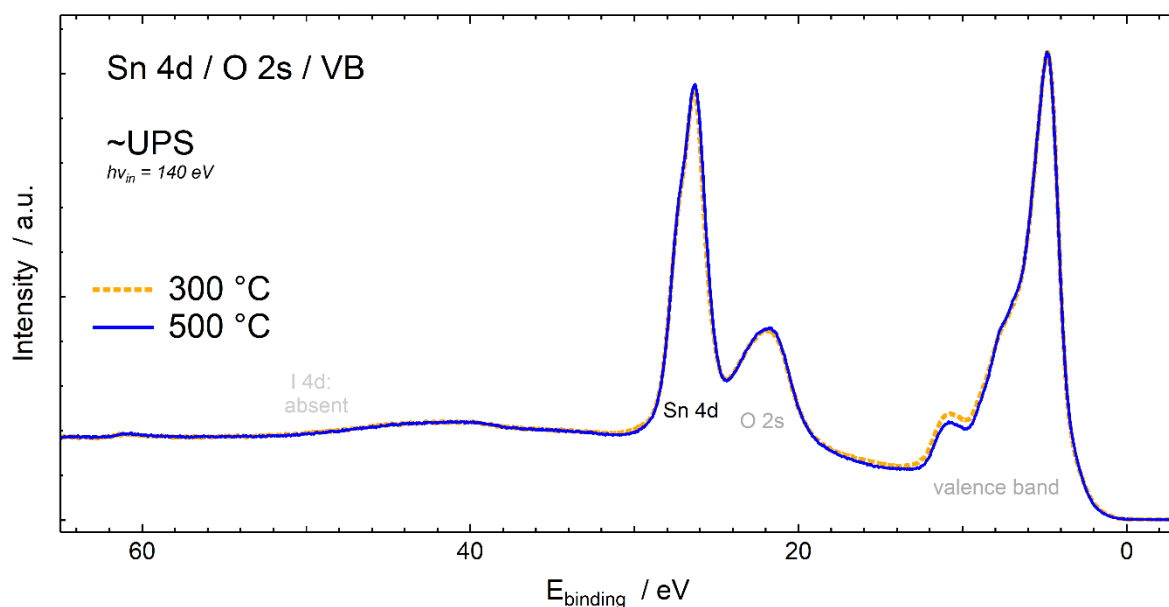

**Figure S1:** Top panel: XPS survey spectra visualising the virtually coinciding tin/oxygen content ratio and the absence of any residual iodine compounds even in the 300 °C sample. Bottom panel: an extended valence-band (and shallow core) binding energy region photoelectron spectrum. We note that the kinetic energy of the I 4d electrons is different in these two panels (ca. 800 vs. ca. 90 eV); therefore, also the probe depth differs. The inelastic mean free path of the photoelectrons changes from ca. 1.5 to 0.5 nm.

This can be compared to the truly bulk-sensitive XRD results, which indicate some iodine present in the 300 °C sample. A plausible explanation would be that although iodine sublimates from the surface region even at 300 °C (and is therefore not seen in XPS), it is not as mobile to segregate to the surface at this temperature (and appears therefore as present in the XRD data).

The C 1s XPS in Figure S2 is taken as a reference to assure that the sample is not charging. It indicates only a very limited adventitious carbon content and, for example, no alien carbonate species.

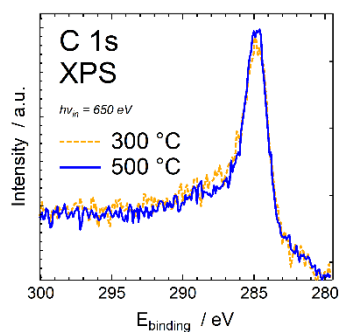

**Figure S2:** C 1s XPS results.
